# Supplementary material for: Dual-responsive shape memory hydrogels with novel thermoplasticity based on a hydrophobically modified polyampholyte
Source: Royal Society of Chemistry journal article supplement (doi:10.1039/c5sm00168d), 2015-01-01
Supplement: c5sm00168d1.pdf [file c5sm00168d1.pdf]

## Supporting information

### 1. Synthesis and characterization of C16DMAEMA and the copolymers

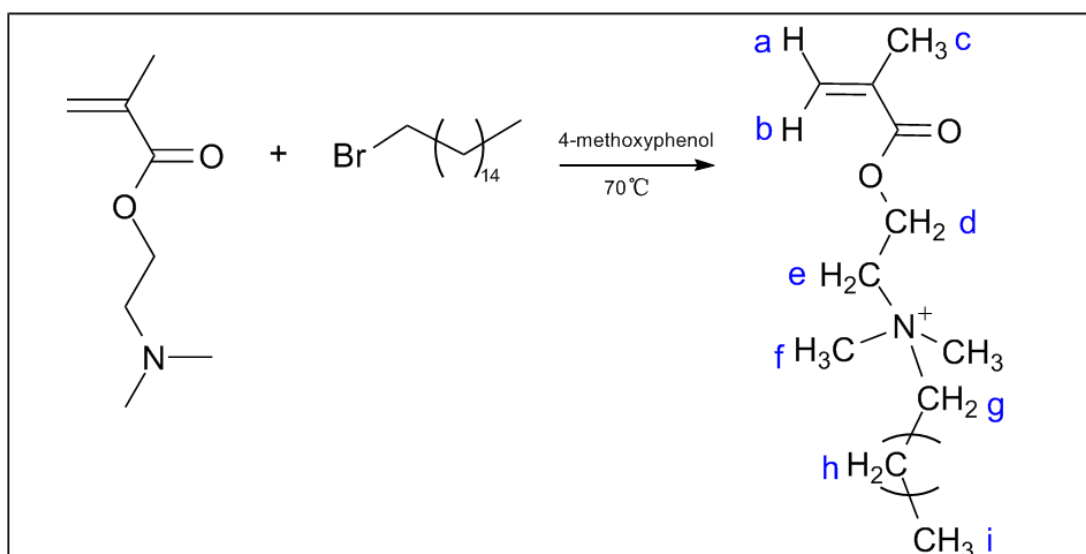

#### <sup>1</sup>HNMR of C16DMAEMA (DMSO-d<sub>6</sub>)

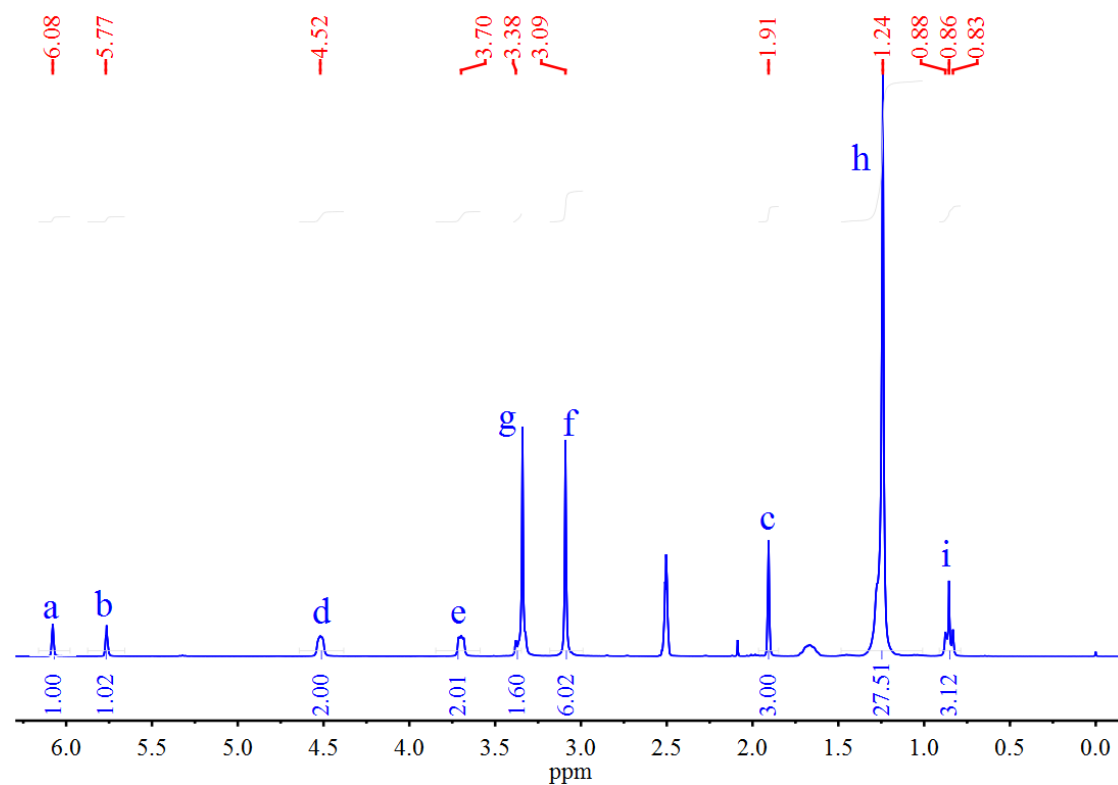

**<sup>1</sup>H NMR of Poly(AM-AA-C16DMAEMA)(DMSO-d6)**

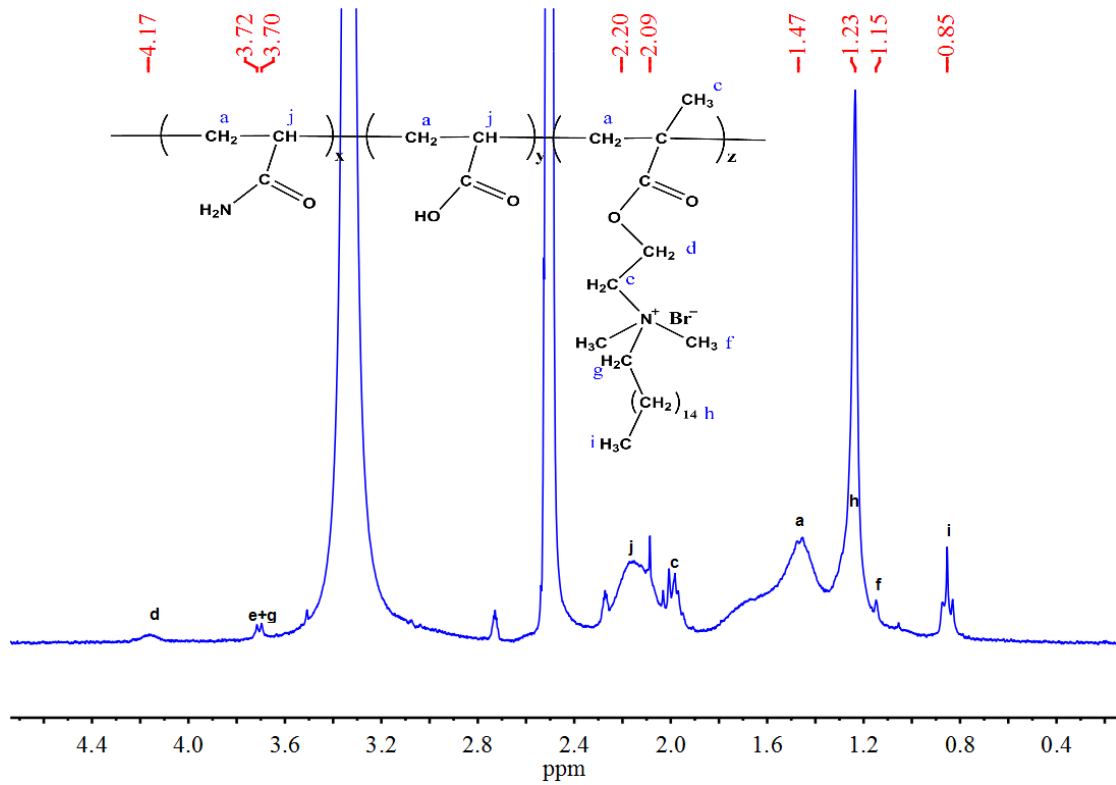

**2. Effect of plate to plate distances on the rheological properties of the hydrogels.**

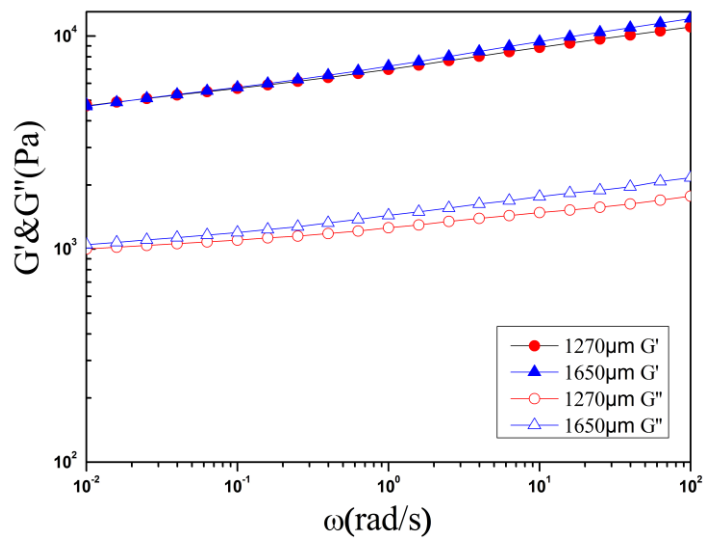

Frequency sweep of a hydrogel sample under two different gap values (1270, 1650  $\mu\text{m}$ ). The molar ratio for AM, AA and C16DMAEMA in the feed is 0.5/0.485/0.015.

3. Shape memory hydrogel induced by  $\text{Fe}^{3+}$  (40mM) was exposed to water environment for 3.5h.

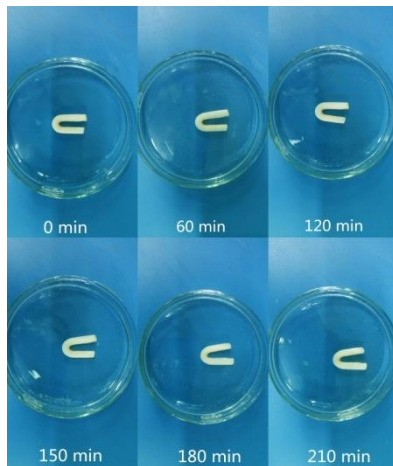

The sample retains its temporary shape perfectly, except that it swells slightly after a long immersion time.
